# Supplementary material
Source: publisher site journal article supplement (https://www.dovepress.com/article/469972)
Supplement: Supplementary file 1 [file get_supplementary_file.php]

**Table S1.** Sequences of shRNA of TICRR

| **Names** | **Target Sequence** |
| --- | --- |
| Sh-TICRR | GCTGGTAAACAGGCTGATTGC |

**Table S2.** Antibodies used for Immunohistochemical (IHC) staining

| Antigen | Dilution | Catalogue Number | Supplier |
| --- | --- | --- | --- |
| TICRR | 1:200 | ab191850 | Abcam |
| Anti-rabbit (secondary antibody) | 1:500 | GB23303 | Servicebio |

**Table S3.** Antibodies used for Immunofluorescence (IF) staining

| Antigen | Dilution | Catalogue Number | Supplier |
| --- | --- | --- | --- |
| TICRR | 1:200 | ab254901 | Abcam |
| Ki67 | 1:200 | ab16667 | Abcam |
| CD4 | 1:200 | GB11064-1 | Servicebio |
| Anti-rabbit (CY5- secondary antibody) | 1:1000 | GB27303 | Servicebio |
| Anti-rabbit (Alexa Fluor 488- secondary antibody) | 1:1000 | GB25303 | Servicebio |
